# Supplementary material for: Immunogenicity and Efficacy of Single Antigen Gp63, Polytope and PolytopeHSP70 DNA Vaccines against Visceral Leishmaniasis in Experimental Mouse Model
Source: PubMed Central journal article supplement (PMC2780826; doi:10.1371/journal.pone.0007880), 2009-12-02
Supplement: pone.0007880.s001.pdf [file pone.0007880.s001.pdf]

ctagtgcgfTtacgGGCCCTCTAGACTCGAGCGGCCGCCACTGTGCTGGATATCTGCAG  
AATTCCACCACaCTGGaCTAGT  
GGTACCAAGCTTAAGTTTAAACCGCTGATCAGCCTCGACTGTGCCTT CTAGTTGCCAGCCATCTGTTGTTTG  
CCCCTCCCCGTGCCTTCCTTGACCCTGGAAGGTGCCACTCCCCTGTCTTTCTAATAAAAATGAGGAAAT  
TGCATCGCATTGTCTGAGTAGGTGTCATTCTATTCTGGGG  
GGATCCGCGGCCATG AGACAGACACACTCCTGTTATGGGTACTGCTGCTCTGGGTTCCAGGTTCCACTGGT  
GACATTGTGCTGACACAGTCTCCTGCTTCCTTAGCTGTATCTCTGGG GCAGAGGGCCACCATCTCATAACAG  
GGCCAGCAAAAGTGTGAGTACATCTGGCTATAGTTATATGCACTGGAACCAACAGAAACCAGGACAGCCAC  
CCAGACTCCTCATCTATCTTGTATCCAACCTAGAATCTGGGGTCCCTGCCAGGTTTCAGTGGCAGTGGGTCTG  
GGACAGACTTCACCCTCAACATCCATCCTGTGGAGGAGGAGGATGCTGCAACCTATTACTGTCAGCACATT  
AGGGAGCTTACACGTTTCG GAGGGGGGACCAAGCTGGAAA GCCAAGTTCGTGGCCGCGTGGACCCTGAAGG  
CCGCGGAGAAAAGTGC GCGCCGCGAAGTGGGGCGCGTGC GCATCTCCGTCTCCAAA GCGGCGCGCTGCAT  
CGATGGCGCCTTCAGGCCGAAGACGACC GAAACCAAAA GGTGGGGTGGGGCAGGACag

### Sequencing Result - Sequence of POLYTOPE DNA vaccine (561bp)
